# Supplementary material for: Passive sensing on mobile devices to improve mental health services with adolescent and young mothers in low-resource settings: the role of families in feasibility and acceptability&nbsp;
Source: Research Square preprint supplement (doi:10.21203/rs.3.rs-22755/v2), 2020-11-04
Supplement: Supplementary file 1 [file 2ba7007580152c07c886993b.docx]

**Supplemental File 4 – Supplemental Tables**

**Table S1 - All participants from only 6AM to 9PM.** Passive sensing readings (n=38)

|  | *Total possible number of readings* | *Observed number of readings* | *Percent mean observed readings per participant* | *Range of percent readings (min—max)* | *Median percent readings (IQR)* |
| --- | --- | --- | --- | --- | --- |
| **GPS** | 8,475 | 3,360 | 38.9% | 0-92.9% | 44.4% (51.9) |
| **Audio** | 8,475 | 5,358 | 62.7 | 13.3-97.2% | 69.4% (29.0) |
| **Proximity** | 8,475 | 4,062 | 45.4% | 0-83.8% | 52.5% (36.5) |
| **Activity** | 8,475 | 4,809 | 55.4 | 0-95.5% | 70% (56.2) |

**Table S2 - All participants from 7AM to 7PM.** (n=38)

|  | *Total possible number of readings* | *Observed number of readings* | *Percent mean observed readings per participant* | *Range of percent readings (min—max)* | *Median percent readings (IQR)* |
| --- | --- | --- | --- | --- | --- |
| **GPS** | 6,780 | 2,851 | 41.3% | 0.0 – 95.8% | 46.5% (54.6) |
| **Audio** | 6,780 | 4,564 | 66.8% | 13.3 – 97.2% | 74.7% (31.8) |
| **Proximity** | 6,780 | 3,513 | 49.1% | 0-90.6% | 54.0% (42.8) |
| **Activity** | 6,780 | 4,065 | 58.5% | 0.0 – 95.8% | 72.7% (61.2) |

**Table S3 – Non-depressed mothers from 6AM to 9PM. (**n=27)

|  | *Total possible number of readings* | *Observed number of readings* | *Percent mean observed readings per participant* | *Range of percent readings (min—max)* | *Median percent readings (IQR)* |
| --- | --- | --- | --- | --- | --- |
| **GPS** | 6.090 | 2,441 | 40.2 | 0-92.9 | 46.2 (53.9) |
| **Audio** | 6.090 | 3,802 | 63.4 | 13.7-92.9 | 70.8 (22.2) |
| **Proximity** | 6.090 | 3,002 | 48.5 | 1.1-83.8 | 58.1 (39.4) |
| **Activity** | 6.090 | 3,209 | 53.0 | 0-92.9 | 69.3 (59.5) |

**Table S4 – Non-depressed mothers 7AM to 7PM. (**n=27)

|  | *Total possible number of readings* | *Observed number of readings* | *Percent mean observed readings per participant* | *Range of percent readings (min—max)* | *Median percent readings (IQR)* |
| --- | --- | --- | --- | --- | --- |
| **GPS** | 4,872 | 2,082 | 42.8 | 0-95.8 | 49.2 (60) |
| **Audio** | 4,872 | 3,278 | 68.2 | 13.3-95.8 | 76.2 (30.1) |
| **Proximity** | 4,872 | 2,601 | 52.5 | 1.4-90.6 | 59.7 (39.7) |
| **Activity** | 4,872 | 2,742 | 56.5 | 0-95.8 | 72.8 (67.4) |

**Table S5 – Depressed mothers from 6AM to 9PM. (**n=11)

|  | *Total possible number of readings* | *Observed number of readings* | *Percent mean observed readings per participant* | *Range of percent readings (min—max)* | *Median percent readings (IQR)* |
| --- | --- | --- | --- | --- | --- |
| **GPS** | 2,385 | 919 | 35.7 | 0-84.4 | 34.4 (45.1) |
| **Audio** | 2,385 | 1,556 | 61.0 | 13.3-97.2 | 57.1 (36.5) |
| **Proximity** | 2,385 | 1.060 | 38.0 | 0-75.9 | 37.3 (23.7) |
| **Activity** | 2,385 | 1,600 | 61.2 | 0-95.4 | 72.5 (29.5) |

**Table S6 – Depressed mothers from 7AM to 7PM. (**n=11)

|  | *Total possible number of readings* | *Observed number of readings* | *Percent mean observed readings per participant* | *Range of percent readings (min—max)* | *Median percent readings (IQR)* |
| --- | --- | --- | --- | --- | --- |
| **GPS** | 1,908 | 769 | 42.8 | 0-88.9 | 37.5 (46.5) |
| **Audio** | 1,908 | 1,286 | 68.2 | 16.7-97.2 | 59.1 (35.6) |
| **Proximity** | 1,908 | 912 | 52.5 | 0-78.8 | 46.1 (25.6) |
| **Activity** | 1,908 | 1,323 | 56.5 | 0-95.5 | 72.6 (27.3) |
